# Supplementary material for: GenomeHubs: simple containerized setup of a custom Ensembl database and web server for any species
Source: Oxford University Press journal article supplement (doi:10.1093/database/bax039), 2017-01-01
Supplement: bax039_Supp.zip [file bax039_Supp.zip]

# Supplementary File 1

Example GenomeHubs commands and configuration files to mirror and import into an Ensembl site. These files are included in the GenomeHubs demo repository (<https://github.com/genomehubs/demo>) and may be run to set up an example GenomeHubs site with the commands:

```
cd
git clone https://github.com/genomehubs/demo
demo/import.sh
```

## Example script: import.sh

<https://github.com/genomehubs/demo/blob/master/import.sh> Sets up a GenomeHubs Ensembl/downloads/BLAST site with one species (the Glanville fritillary, *Melitaea cinxia*) mirrored from Ensembl Metazoa and a second species (the winter moth, *Opheroptera brumata*) imported directly from FASTA and GFF files.

```
#!/bin/bash

# =====
# import.sh - automated commands to import an assembly from FASTA and GFF
#
# Usage:
# cd
# git clone https://github.com/genomehubs/demo
# cd demo
# ./import.sh
#
# Prerequisites:
# Requires Docker and assumes UID 1000
# =====

echo Step 1. Set up mySQL container

docker run -d \
    --name genomehubs-mysql \
    -e MYSQL_ROOT_PASSWORD=rootuserpassword \
    -e MYSQL_ROOT_HOST='172.17.0.0/255.255.0.0' \
    mysql/mysql-server:5.5 &&

sleep 10 &&

echo Step 2. Set up template database using EasyMirror &&

docker run --rm \
    --name genomehubs-ensembl \
```

```

-v ~/demo/genomehubs-import/ensembl/conf:/ensembl/conf \
-v ~/demo/genomehubs-import/ensembl/logs:/ensembl/logs \
--link genomehubs-mysql \
-p 8081:8080 \
genomehubs/easy-mirror:17.03 /ensembl/scripts/database.sh
/ensembl/conf/database.ini &&

echo Step 3. Import sequences, prepare gff and import gene models &&

docker run --rm \
--name easy-import-operophtera_brumata_v1_core_32_85_1 \
--link genomehubs-mysql \
-v ~/demo/genomehubs-import/import/conf:/import/conf \
-v ~/demo/genomehubs-import/import/data:/import/data \
-v ~/demo/genomehubs-import/download/data:/import/download \
-v ~/demo/genomehubs-import/blast/data:/import/blast \
-e DATABASE=operophtera_brumata_v1_core_32_85_1 \
-e FLAGS="-s -p -g" \
genomehubs/easy-import:17.03 &&

echo Step 4. Export sequences, export json and index database for imported
Operophtera brumata &&

docker run --rm \
--name easy-import-operophtera_brumata_v1_core_32_85_1 \
--link genomehubs-mysql \
-v ~/demo/genomehubs-import/import/conf:/import/conf \
-v ~/demo/genomehubs-import/import/data:/import/data \
-v ~/demo/genomehubs-import/download/data:/import/download \
-v ~/demo/genomehubs-import/blast/data:/import/blast \
-e DATABASE=operophtera_brumata_v1_core_32_85_1 \
-e FLAGS="-e -j -i" \
genomehubs/easy-import:17.03 &&

ls ~/demo/genomehubs-import/download/data/sequence/Operophtera* 2> /dev/null &&

echo Step 5. Export sequences, export json and index database for mirrored
Melitaea cinxia &&

docker run --rm \
--name easy-import-melitaea_cinxia_core_32_85_1 \
--link genomehubs-mysql \
-v ~/demo/genomehubs-import/import/conf:/import/conf \
-v ~/demo/genomehubs-import/import/data:/import/data \
-v ~/demo/genomehubs-import/download/data:/import/download \
-v ~/demo/genomehubs-import/blast/data:/import/blast \
-e DATABASE=melitaea_cinxia_core_32_85_1 \
-e FLAGS="-e -i -j" \
genomehubs/easy-import:17.03 &&

```

```

ls ~/demo/genomehubs-import/download/data/sequence/Melitaea* 2> /dev/null &&

echo Step 6. Startup h5ai downloads server &&

docker run -d \
    --name genomehubs-h5ai \
    -v ~/demo/genomehubs-import/download/conf:/conf \
    -v ~/demo/genomehubs-import/download/data:/var/www/demo \
    -p 8082:8080 \
    genomehubs/h5ai:17.03 &&

echo Step 7. Startup SequenceServer BLAST server &&

docker run -d \
    --name genomehubs-sequenceserver \
    -v ~/demo/genomehubs-import/blast/conf:/conf \
    -v ~/demo/genomehubs-import/blast/data:/dbs \
    -p 8083:4567 \
    genomehubs/sequenceserver:17.03 &&

echo Step 8. Startup GenomeHubs Ensembl mirror &&

docker run -d \
    --name genomehubs-ensembl \
    -v ~/demo/genomehubs-import/ensembl/gh-conf:/ensembl/conf \
    -v ~/demo/genomehubs-import/ensembl/logs:/ensembl/logs \
    --link genomehubs-mysql \
    -p 8081:8080 \
    genomehubs/easy-mirror:17.03 &&

echo Step 9. Waiting for site to load &&

until $(curl --output /dev/null --silent --head --fail
http://127.0.0.1:8081//i/placeholder.png); do
    printf '.'
    sleep 5
done &&

echo done &&

echo Visit your mirror site at 127.0.0.1:8081 &&

exit

echo Unable to set up GenomeHubs site, removing containers

docker stop genomehubs-mysql && docker rm genomehubs-mysql
docker stop genomehubs-ensembl && docker rm genomehubs-ensembl
docker stop genomehubs-h5ai && docker rm genomehubs-h5ai
docker stop genomehubs-sequenceserver && docker rm genomehubs-sequenceserver

```

## Database configuration file: database.ini

<https://github.com/genomehubs/demo/blob/master/genomehubs-import/ensembl/conf/database.ini> Specifies passwords for the database users required by Ensembl/genomehubs and contains instructions to download local copies of the ncbi\_taxonomy and melitaea\_cinxia\_core\_32\_85\_1 databases.

```
[DATABASE]
DB_USER = anonymous
DB_PASS =

DB_SESSION_USER = sessionuser
DB_SESSION_PASS = sessionuserpassword
DB_SESSION_NAME = ensembl_accounts

DB_IMPORT_USER = importuser
DB_IMPORT_PASS = importuserpassword

DB_ROOT_USER = root
DB_ROOT_PASSWORD = rootuserpassword
DB_PORT = 3306
DB_HOST = genomehubs-mysql

[WEBSITE]
ENSEMBL_WEBSITE_HOST = 172.17.0.0/255.255.0.0

[DATA_SOURCE]
ENSEMBL_DB_URL = ftp://ftp.ensembl.org/pub/release-85/mysql/
ENSEMBL_DB_REPLACE =
ENSEMBL_DBS =

EG_DB_URL = ftp://ftp.ensemblgenomes.org/pub/release-32/pan_ensembl/mysql/
EG_DB_REPLACE =
EG_DBS = [ ncbi_taxonomy ]

SPECIES_DB_URL = ftp://ftp.ensemblgenomes.org/pub/release-32/metazoa/mysql/
SPECIES_DB_REPLACE =
SPECIES_DB_AUTO_EXPAND =
SPECIES_DBS = [ melitaea_cinxia_core_32_85_1 ]

MISC_DB_URL = ftp://ftp.ensembl.org/pub/release-79/mysql/
MISC_DB_REPLACE =
MISC_DBS = [ ensembl_accounts ]
```

## EasyMirror configuration file: setup.ini

<https://github.com/genomehubs/demo/blob/master/genomehubs-import/ensembl/conf/setup.ini> Defines connection settings for the local database (inside a linked docker container) and remote databases used to retrieve data not hosted locally and lists databases and Ensembl plugins to include in the hosted site.

```
[DATABASE]
DB_HOST = genomehubs-mysql
DB_PORT = 3306
DB_USER = anonymous
DB_PASS =

DB_SESSION_HOST = genomehubs-mysql
DB_SESSION_PORT = 3306
DB_SESSION_USER = sessionuser
DB_SESSION_PASS = sessionuserpassword

DB_FALLBACK_HOST = mysql-eg-publicsql.ebi.ac.uk
DB_FALLBACK_PORT = 4157
DB_FALLBACK_USER = anonymous
DB_FALLBACK_PASS =

DB_FALLBACK2_HOST = ensembl.db.ensembl.org
DB_FALLBACK2_PORT = 3306
DB_FALLBACK2_USER = anonymous
DB_FALLBACK2_PASS =

[REPOSITORIES]
ENSEMBL_URL = https://github.com/Ensembl
ENSEMBL_BRANCH = release/85

BIOPERL_URL = https://github.com/bioperl
BIOPERL_BRANCH = master

GENOMEHUBS_PLUGIN_URL = https://github.com/genomehubs/gh-ensembl-plugin
GENOMEHUBS_PLUGIN_BRANCH = 17.03
GENOMEHUBS_PLUGIN_PACKAGE = EG::GenomeHubs

EG_METAZOA_PLUGIN_URL = https://github.com/EnsemblGenomes/eg-web-metazoa
EG_METAZOA_PLUGIN_BRANCH = release/eg/32
EG_METAZOA_PLUGIN_PACKAGE = EG::Metazoa

API_PLUGIN_URL = https://github.com/EnsemblGenomes/ensemblgenomes-api
API_PLUGIN_BRANCH = release/eg/32
API_PLUGIN_PACKAGE = EG::API

EG_COMMON_PLUGIN_URL = https://github.com/EnsemblGenomes/eg-web-common
EG_COMMON_PLUGIN_BRANCH = release/eg/32
```

```

EG_COMMON_PLUGIN_PACKAGE = EG::Common

PUBLIC_PLUGINS = [ ]

[WEBSITE]
HTTP_PORT = 8080
SERVER_ROOT = /ensembl

[DATA_SOURCE]
SPECIES_DBs = [
  melitaea_cinxia_core_32_85_1
  operophtera_brumata_v1_core_32_85_1
]
SPECIES_DB_AUTO_EXPAND [ ]
MULTI_DBs = [ ensemblgenomes_ontology_32_85 ensemblgenomes_info_32
ensembl_archive_85 ensembl_website_85 ]
COMPARA_DBs = [ ensembl_compara_metazoa_32_85
ensembl_compara_pan_homology_32_85 ]

```

## EasyImport configuration file: operophtera\_brumata\_core\_32\_85\_1.ini

[https://github.com/genomehubs/demo/blob/master/genomehubs-import/import/conf/operophtera\\_brumata\\_v1\\_core\\_32\\_85\\_1.ini](https://github.com/genomehubs/demo/blob/master/genomehubs-import/import/conf/operophtera_brumata_v1_core_32_85_1.ini) Specifies assembly-specific settings: the database name to create and import into; metadata describing the species, assembly and genebuild; remote files to import; and patterns to obtain stable identifiers from the GFF file.

```

[DATABASE_CORE]
  NAME = operophtera_brumata_v1_core_32_85_1
[META]
  SPECIES.PRODUCTION_NAME = operophtera_brumata_v1
  SPECIES.SCIENTIFIC_NAME = Operophtera brumata
  SPECIES.COMMON_NAME = Winter moth
  SPECIES.DISPLAY_NAME = Operophtera brumata
  SPECIES.DIVISION = EnsemblMetazoa
  SPECIES.URL = Operophtera_brumata_v1
  SPECIES.TAXONOMY_ID = 104452
  SPECIES.ALIAS = [ operophtera_brumata operophtera_brumata_v1
operophtera%20brumata winter%20moth ]
  ASSEMBLY.NAME = v1
  ASSEMBLY.DATE = 2015-08-11
  ASSEMBLY.ACCESSION = GCA_001266575.1
  ASSEMBLY.DEFAULT = v1
  PROVIDER.NAME = Wageningen University
  PROVIDER.URL = http://www.bioinformatics.nl/wintermoth
  GENEBUILD.ID = 2
  GENEBUILD.START_DATE = 2016-08

```

```

GENEBUILD.VERSION = 2
GENEBUILD.METHOD = import
SAMPLE.LOCATION_PARAM      = OBRU01_Sc00001:57580-69243
SAMPLE.LOCATION_TEXT       = OBRU01_Sc00001:57580-69243
SAMPLE.GENE_PARAM         = OBRU01_00004
SAMPLE.GENE_TEXT          = OBRU01_00004
SAMPLE.TRANSSCRIPT_PARAM  = OBRU01_00004-RA
SAMPLE.TRANSSCRIPT_TEXT   = OBRU01_00004-RA
SAMPLE.SEARCH_TEXT        = OBRU01_00015-RA

[FILES]
SCAFFOLD = [ fa http://download.lepbase.org/v4/provider/Obru1.fsa.gz ]
GFF = [ gff3 http://download.lepbase.org/v4/provider/Obru_genes.gff.gz ]
PROTEIN = [ fa http://download.lepbase.org/v4/provider/ObruPep.fasta.gz ]

[GENE_STABLE_IDS]
GFF = [ gene->Name /(.)+ / ]

[TRANSCRIPT_STABLE_IDS]
GFF = [ SELF->Name /(.)+ / ]

[TRANSLATION_STABLE_IDS]
GFF = [ SELF->Name /(.)+ / -RA/-PA / ]

[MODIFY]
OVERWRITE_DB = 1
TRUNCATE_SEQUENCE_TABLES = 1
TRUNCATE_GENE_TABLES = 1

```

## EasyImport configuration file: default.ini

<https://github.com/genomehubs/demo/blob/master/genomehubs-import/import/conf/default.in>  
 i Sets common parameters as defaults to simplify the assembly-specific INI files. Any parameters in this file can be overwritten by entries in an assembly-specific INI file.

```

[DATABASE_CORE]
HOST = genomehubs-mysql
PORT = 3306
RW_USER =
RW_PASS =
RO_USER = anonymous
RO_PASS =

[DATABASE_SEARCH]
NAME = genomehubs_search_32_85
HOST = genomehubs-mysql
PORT = 3306
RW_USER = importuser
RW_PASS = importuserpassword
RO_USER = anonymous
RO_PASS =

[DATABASE_TAXONOMY]
NAME = ncbi_taxonomy
HOST = genomehubs-mysql
PORT = 3306
RO_USER = anonymous

```

```

RO_PASS =
[DATABASE_TEMPLATE]
NAME = melitaea_cinxia_core_32_85_1
HOST = genomehubs-mysql
PORT = 3306
RO_USER = anonymous
RO_PASS =

[GFF]
SORT = 1
CHUNK = [ change region ]
_CONDITION_1 = [ MULTILINE CDS ]
_CONDITION_2 = [ MULTILINE cDNA_match ]
_CONDITION_3 = [ MULTILINE match ]
_CONDITION_4 = [ MULTILINE three_prime_utr ]
_CONDITION_5 = [ MULTILINE five_prime_utr ]
_CONDITION_6 = [ LACKS_ID CDS make ]
_CONDITION_7 = [ EXPECTATION cds hasSister exon force ]
_CONDITION_8 = [ EXPECTATION cds hasParent mrna force ]
_CONDITION_9 = [ EXPECTATION exon          hasParent
transcript|mrna|mirna|trna|ncrna|rrna force ]
_CONDITION_10 = [ EXPECTATION mrna          hasParent gene force ]
_CONDITION_11 = [ EXPECTATION ncrna hasParent gene force ]
_CONDITION_12 = [ EXPECTATION trna          hasParent gene force ]
_CONDITION_13 = [ EXPECTATION transcript          hasParent gene force ]
_CONDITION_14 = [ EXPECTATION five_prime_utr hasParent mrna force ]
_CONDITION_15 = [ EXPECTATION three_prime_utr hasParent mrna force ]
_CONDITION_16 = [ EXPECTATION
cds|exon|mrna|five_prime_utr|three_prime_utr|transcript|trna|ncrna|gene
<=[_start,_end] SELF warn ]

```
